# Supplementary material for: Protective Effects of Naringenin from Citrus sinensis (var. Valencia) Peels against CCl4-Induced Hepatic and Renal Injuries in Rats Assessed by Metabolomics, Histological and Biochemical Analyses
Source: MDPI journal article supplement (doi:10.3390/nu14040841), 2022-02-17
Supplement: s1 [file s1]

# Protective Effects of Naringenin from *Citrus sinensis* (var. Valencia) Peels against CCl<sub>4</sub>-Induced Hepatic and Renal Injuries in Rats Assessed by Metabolomics, Histological and Biochemical Analyses

Naglaa M. Ammar <sup>1</sup>, Heba A. Hassan <sup>1</sup>, Heba M. I. Abdallah <sup>2</sup>, Sherif M. Afifi <sup>3</sup>, Abdelbaset M. Elgamal <sup>4</sup>, Abdel Razik H. Farrag <sup>5</sup>, Abd El-Nasser G. El-Gendy <sup>6</sup>, Mohamed A. Farag <sup>7,8</sup>, Abdelsamed I. Elshamy <sup>9,\*</sup>

<sup>1</sup> Therapeutic Chemistry Department, Pharmaceutical and Drugs research Institute, National Research Centre, 33 El Bohouth St., Dokki, Giza, 12622, Egypt; nm.ammar@nrc.sci.eg (N.M.A.); ha.el-saud@nrc.sci.eg (H.A.H.)

<sup>2</sup> Pharmacology Department, Medical Research and clinical studies institute, National Research Centre, 12622, Dokki, Giza, Egypt; heba21\_5@yahoo.com

<sup>3</sup> Pharmacognosy Department, Faculty of Pharmacy, University of Sadat City, Sadat City 32897, Egypt; shshsh38@hotmail.com

<sup>4</sup> Chemistry of Microbial and Natural Products Department, Pharmaceutical and Drugs research Institute, National Research Centre, 33 El-Bohouth St., Dokki, Giza 12622, Egypt; ; algamalene@yahoo.com

<sup>5</sup> Department of Pathology, Medical Research and clinical studies institute, National Research Centre, 33 El Bohouth St. Dokki, Giza 12622, Egypt; ar.hussein@nrc.sci.eg

<sup>6</sup> Medicinal and Aromatic Plants Research Department, Pharmaceutical and Drugs research Institute, National Research Centre, Cairo, Egypt; aggundy\_5@yahoo.com

<sup>7</sup> Pharmacognosy Department, College of Pharmacy, Cairo University, Kasr el Aini St., Cairo P.B. 11562, Egypt; mfarrag73@yahoo.com

<sup>8</sup> School of Forestry and Biotechnology, Zhejiang A&F University, Lin'an, 311300 China

<sup>9</sup> Chemistry of Natural Compounds Department, Pharmaceutical and Drugs Research Institute, National Research Centre, Giza 12622, Egypt

\* **Correspondence:** elshamynrc@yahoo.com or ai.el-shamy@nrc.sci.eg; Tel.: +20-100-552-5108 (A.I.E.)

| No | Supplementary data                                                                                                                                                                                                                                                                                                                                                                                                           | Page |
|----|------------------------------------------------------------------------------------------------------------------------------------------------------------------------------------------------------------------------------------------------------------------------------------------------------------------------------------------------------------------------------------------------------------------------------|------|
| 1  | Figure S1: Area of BCl <sub>2</sub> immnuohistochemical expression in hepatic tissue measured by the image analysis system as area percent. Data are expressed as Mean $\pm$ SE (n = 6). Statistical analysis was carried out by one-way ANOVA using Tukey as post-hoc test. <sup>a</sup> Significantly different from Control negative at P < 0.05. <sup>b</sup> Significantly different from Control positive at P < 0.05. | 2    |
| 2  | Figure S2:: Area of BCl <sub>2</sub> immnuohistochemical expression in renal tissue measured by the image analysis system as area percent. Data are expressed as Mean $\pm$ SE (n = 6). Statistical analysis was carried out by one-way ANOVA using Tukey as post-hoc test. <sup>a</sup> Significantly different from Control negative at P < 0.05. <sup>b</sup> Significantly different from Control positive at P < 0.05.  | 3    |
| 3  | Table S1. Relative percentile of silylated primary metabolites in sera from all groups using SPME-GC-MS (n = 6), results are presented as average $\pm$ (std. deviation)                                                                                                                                                                                                                                                     | 4-7  |
| 4  | Figure S3. The representative chromatograms of serum samples from different animal groups                                                                                                                                                                                                                                                                                                                                    | 8    |

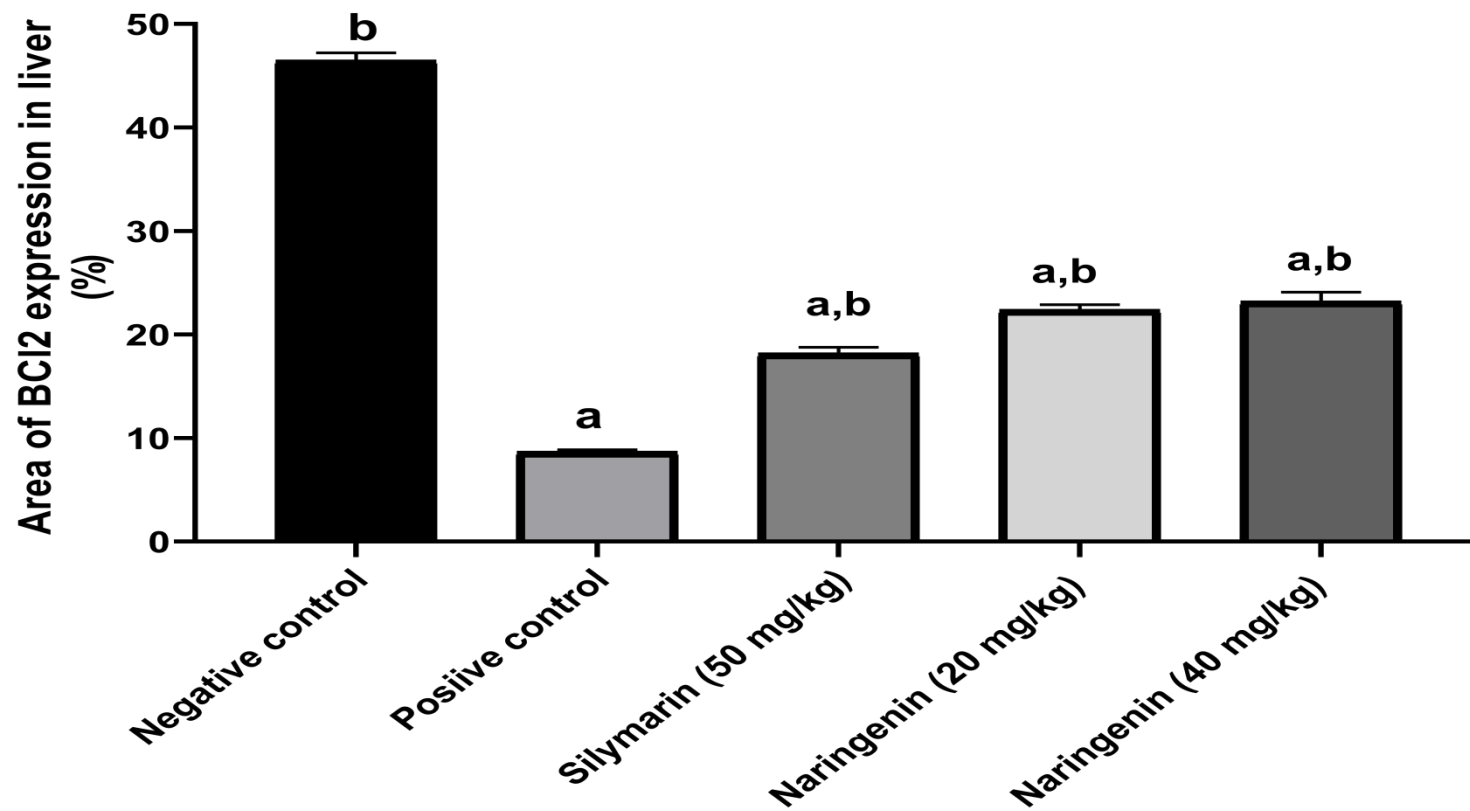

**Figure S1:** Area of Bcl2 immunohistochemical expression in hepatic tissue measured by the image analysis system as area percent. Data are expressed as Mean  $\pm$  SE (n = 6). Statistical analysis was carried out by one-way ANOVA using Tukey as post-hoc test. <sup>a</sup> Significantly different from Control negative at P < 0.05. <sup>b</sup> Significantly different from Control positive at P < 0.05.

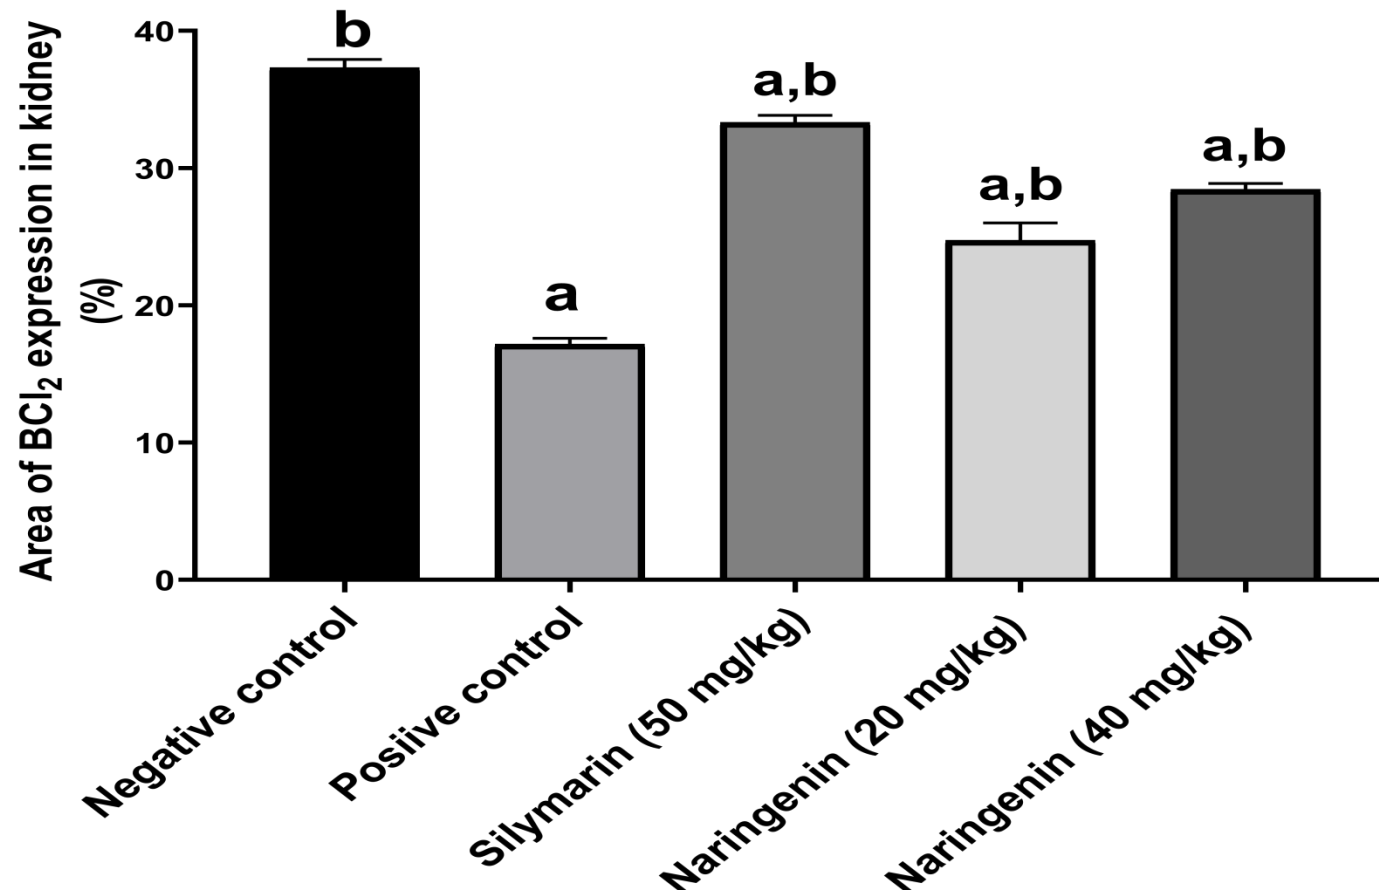

**Figure S2::** Area of BCl<sub>2</sub> immunohistochemical expression in renal tissue measured by the image analysis system as area percent. Data are expressed as Mean  $\pm$  SE (n = 6). Statistical analysis was carried out by one-way ANOVA using Tukey as post-hoc test. <sup>a</sup> Significantly different from Control negative at P < 0.05. <sup>b</sup> Significantly different from Control positive at P < 0.05.

**Table S1.** Relative percentile of silylated primary metabolites in sera from all groups using SPME-GC-MS (n = 6), results are presented as average  $\pm$  (std. deviation)

| No. | Rt(min)             | KI   | Name                    | Control         | Nar. 20 mg      | Nar. 40 mg      | CCL <sub>4</sub> | Silymarin       |
|-----|---------------------|------|-------------------------|-----------------|-----------------|-----------------|------------------|-----------------|
|     | <b>Amino acids</b>  |      |                         |                 |                 |                 |                  |                 |
| 1   | 5.051               | 1099 | L-Alanine, 2TMS         | 0.66 $\pm$ 0.57 | 0.45 $\pm$ 0.51 | 0.68 $\pm$ 0.88 | 0.45 $\pm$ 0.40  | 0.43 $\pm$ 0.57 |
| 2   | 5.095               | 1102 | L-Alanine, 2TMS isomer  | 0.81 $\pm$ 0.31 | 0.41 $\pm$ 0.32 | 0.61 $\pm$ 0.51 | 0.45 $\pm$ 0.30  | 0.45 $\pm$ 0.35 |
| 3   | 5.452               | 1122 | Glycine, 2TMS           | 0.01 $\pm$ 0.01 | 0.00 $\pm$ 0.01 | -----           | 0.01 $\pm$ 0.01  | 0.01 $\pm$ 0.01 |
| 4   | 7.015               | 1208 | L-Valine, 2TMS          | 0.08 $\pm$ 0.08 | 0.11 $\pm$ 0.12 | 0.11 $\pm$ 0.13 | 0.09 $\pm$ 0.11  | 0.11 $\pm$ 0.12 |
| 5   | 8.451               | 1316 | L-Isoleucine, 2TMS      | 0.04 $\pm$ 0.02 | 0.04 $\pm$ 0.04 | 0.04 $\pm$ 0.04 | 0.06 $\pm$ 0.06  | 0.04 $\pm$ 0.05 |
| 6   | 8.586               | 1321 | L-Proline, 2TMS         | 0.20 $\pm$ 0.16 | 0.06 $\pm$ 0.09 | 0.07 $\pm$ 0.10 | 0.09 $\pm$ 0.08  | 0.07 $\pm$ 0.09 |
| 7   | 8.659               | 1324 | Glycine, 2TMS isomer    | 0.67 $\pm$ 0.21 | 0.44 $\pm$ 0.22 | 0.27 $\pm$ 0.14 | 0.46 $\pm$ 0.31  | 0.55 $\pm$ 0.39 |
| 8   | 9.681               | 1362 | Serine, 3TMS            | 0.39 $\pm$ 0.42 | 0.31 $\pm$ 0.29 | 0.41 $\pm$ 0.25 | 0.64 $\pm$ 0.44  | 0.61 $\pm$ 0.55 |
| 9   | 10.084              | 1377 | L-Threonine, 3TMS       | 0.54 $\pm$ 0.15 | 0.75 $\pm$ 0.43 | 0.72 $\pm$ 0.40 | 0.69 $\pm$ 0.48  | 0.83 $\pm$ 0.54 |
| 10  | 12.62               | 1468 | L-Methionine, 2TMS      | 0.16 $\pm$ 0.06 | 0.06 $\pm$ 0.03 | 0.06 $\pm$ 0.03 | 0.09 $\pm$ 0.06  | 0.06 $\pm$ 0.04 |
| 11  | 12.753              | 1473 | Pyroglutamic acid, 2TMS | 0.81 $\pm$ 0.26 | 0.40 $\pm$ 0.25 | 0.31 $\pm$ 0.23 | 0.53 $\pm$ 0.38  | 0.54 $\pm$ 0.38 |
| 12  | 14.151              | 1591 | L-Ornithine, 3TMS       | 0.02 $\pm$ 0.01 | 0.01 $\pm$ 0.00 | 0.01 $\pm$ 0.01 | 0.01 $\pm$ 0.01  | -----           |
| 13  | 14.281              | 1604 | L-Glutamic acid, 3TMS   | 0.01 $\pm$ 0.00 | -----           | -----           | -----            | 0.00 $\pm$ 0.01 |
| 14  | 14.413              | 1612 | Phenylalanine, 2TMS     | 0.25 $\pm$ 0.11 | 0.13 $\pm$ 0.07 | 0.13 $\pm$ 0.08 | 0.14 $\pm$ 0.08  | 0.14 $\pm$ 0.09 |
| 15  | 16.787              | 1761 | L-Glutamine, 3TMS       | 0.01 $\pm$ 0.01 | 0.01 $\pm$ 0.01 | 0.01 $\pm$ 0.02 | 0.01 $\pm$ 0.00  | 0.01 $\pm$ 0.01 |
| 16  | 17.212              | 1788 | L-Ornithine, 4TMS       | 0.11 $\pm$ 0.04 | 0.12 $\pm$ 0.09 | 0.05 $\pm$ 0.03 | 0.15 $\pm$ 0.11  | 0.13 $\pm$ 0.09 |
| 17  | 18.778              | 1896 | L-Lysine, 4TMS          | 0.36 $\pm$ 0.09 | 0.22 $\pm$ 0.15 | 0.17 $\pm$ 0.16 | 0.19 $\pm$ 0.13  | 0.25 $\pm$ 0.16 |
| 18  | 19.139              | 1921 | L-Tyrosine, 3TMS        | 0.26 $\pm$ 0.12 | 0.07 $\pm$ 0.05 | 0.07 $\pm$ 0.04 | 0.12 $\pm$ 0.11  | 0.10 $\pm$ 0.08 |
| 19  | 22.862              | 2152 | L-Tryptophan, 3TMS      | 0.80 $\pm$ 0.23 | 0.31 $\pm$ 0.18 | 0.39 $\pm$ 0.24 | 0.23 $\pm$ 0.21  | 0.27 $\pm$ 0.18 |
|     | Total amino acids   |      |                         | 6.19            | 3.90            | 4.12            | 4.42             | 4.61            |
|     | <b>Amino sugars</b> |      |                         |                 |                 |                 |                  |                 |
| 20  | 22.221              | 2114 | Glucosamine, 6TMS       | 1.89 $\pm$ 1.14 | 2.57 $\pm$ 1.32 | 4.70 $\pm$ 2.13 | 2.49 $\pm$ 1.33  | 3.30 $\pm$ 1.46 |
|     | Total amino sugars  |      |                         | 1.89            | 2.57            | 4.70            | 2.49             | 3.30            |

|    |                              |      |                              |             |             |             |               |             |
|----|------------------------------|------|------------------------------|-------------|-------------|-------------|---------------|-------------|
|    | <b>Esters</b>                |      |                              |             |             |             |               |             |
| 21 | 16.438                       | 1738 | Glycerol-3-phosphate, 4TMS   | 0.01 ± 0.00 | -----       | -----       | 0.01 ± 0.01   | -----       |
|    | Total esters                 |      |                              | 0.01        | -----       | -----       | 0.01          | -----       |
|    | <b>Fatty acids</b>           |      |                              |             |             |             |               |             |
| 22 | 9.891                        | 1370 | Nonanoic acid, TMS           | 0.03 ± 0.02 | 0.02 ± 0.02 | 0.02 ± 0.02 | 0.04 ± 0.04   | 0.03 ± 0.03 |
| 23 | 11.644                       | 1434 | 8-Methylnonanoic acid, TMS   | 0.02 ± 0.01 | 0.02 ± 0.02 | 0.01 ± 0.02 | 0.04 ± 0.03   | 0.02 ± 0.03 |
| 24 | 14.964                       | 1646 | Lauric acid, TMS             | 0.43 ± 0.32 | 0.44 ± 0.45 | 0.30 ± 0.32 | 0.61 ± 0.64   | 0.57 ± 0.67 |
| 25 | 18.011                       | 1843 | Myristic acid, TMS           | 0.19 ± 0.20 | 0.23 ± 0.30 | 0.15 ± 0.21 | 0.57 ± 0.94   | 0.34 ± 0.52 |
| 26 | 18.022                       | 1843 | Myristic acid, TMS isomer    | 0.36 ± 0.24 | 0.37 ± 0.38 | 0.23 ± 0.28 | 0.67 ± 0.88   | 0.48 ± 0.55 |
| 27 | 19.432                       | 1941 | Pentadecanoic acid, TMS      | 0.04 ± 0.03 | 0.04 ± 0.05 | 0.03 ± 0.04 | 0.17 ± 0.29   | 0.06 ± 0.09 |
| 28 | 20.822                       | 2031 | Palmitic Acid, TMS           | 3.27 ± 0.77 | 3.13 ± 1.63 | 2.36 ± 1.25 | 10.43 ± 17.54 | 3.22 ± 1.35 |
| 29 | 20.856                       | 2033 | Palmitic Acid, TMS isomer    | 2.63 ± 1.69 | 2.23 ± 2.38 | 1.65 ± 1.94 | 7.73 ± 12.05  | 2.55 ± 2.22 |
| 30 | 21.433                       | 2067 | Methyl linoleate             | 0.06 ± 0.03 | 0.04 ± 0.04 | 0.13 ± 0.12 | 0.08 ± 0.10   | 0.07 ± 0.05 |
| 31 | 22.101                       | 2107 | Margaric acid, TMS           | 0.18 ± 0.07 | 0.17 ± 0.10 | 0.13 ± 0.08 | 0.32 ± 0.36   | 0.16 ± 0.12 |
| 32 | 23.038                       | 2162 | Oleic acid, TMS              | 0.21 ± 0.13 | 0.13 ± 0.13 | 0.14 ± 0.12 | 0.30 ± 0.39   | 0.30 ± 0.26 |
| 33 | 23.115                       | 2166 | Oleic acid, TMS              | 0.06 ± 0.06 | 0.06 ± 0.09 | 0.07 ± 0.10 | 0.18 ± 0.33   | 0.09 ± 0.16 |
| 34 | 23.128                       | 2167 | Petroselinic acid, TMS       | 0.14 ± 0.10 | 0.14 ± 0.16 | 0.13 ± 0.15 | 0.35 ± 0.42   | 0.18 ± 0.23 |
| 35 | 23.392                       | 2183 | Stearic acid, TMS            | 0.76 ± 0.59 | 0.78 ± 1.01 | 0.64 ± 0.76 | 1.95 ± 2.38   | 0.79 ± 1.06 |
| 36 | 24.89                        | 2271 | Arachidonic acid, TMS        | 0.07 ± 0.02 | 0.03 ± 0.02 | 0.04 ± 0.04 | 0.04 ± 0.05   | 0.04 ± 0.03 |
|    | Total fatty acids            |      |                              | 8.44        | 7.83        | 6.04        | 23.47         | 8.87        |
|    | <b>Inorganic acids</b>       |      |                              |             |             |             |               |             |
| 37 | 8.183                        | 1306 | Phosphoric acid, 3TMS        | 0.94 ± 0.37 | 0.93 ± 0.72 | 0.49 ± 0.32 | 0.92 ± 0.53   | 1.01 ± 0.33 |
| 38 | 8.278                        | 1310 | Phosphoric acid, 3TMS isomer | 1.00 ± 0.40 | 0.72 ± 0.49 | 0.42 ± 0.24 | 0.69 ± 0.49   | 0.53 ± 0.38 |
|    | Total inorganic acids        |      |                              | 1.94        | 1.65        | 0.91        | 1.61          | 1.54        |
|    | <b>Nitrogenous compounds</b> |      |                              |             |             |             |               |             |
| 39 | 5.131                        | 1105 | Hydroxylamine, 3TMS          | 0.68 ± 0.43 | 0.17 ± 0.13 | 0.04 ± 0.03 | 0.45 ± 0.29   | 0.27 ± 0.28 |
| 40 | 6.07                         | 1155 | 2-Piperidinone, TMS          | -----       | 0.01 ± 0.01 | 0.01 ± 0.01 | 0.01 ± 0.02   | -----       |

|    |                             |      |                              |             |             |              |             |             |
|----|-----------------------------|------|------------------------------|-------------|-------------|--------------|-------------|-------------|
| 41 | 7.813                       | 1281 | Urea, 2TMS                   | 0.11 ± 0.07 | 0.08 ± 0.07 | 0.08 ± 0.11  | 0.07 ± 0.06 | 0.07 ± 0.09 |
| 42 | 8.059                       | 1301 | Urea, 2TMS isomer            | 0.71 ± 0.20 | 0.44 ± 0.30 | 0.46 ± 0.30  | 0.47 ± 0.31 | 0.36 ± 0.23 |
| 43 | 8.116                       | 1303 | Urea, 2TMS isomer            | 2.82 ± 0.39 | 2.21 ± 1.45 | 1.44 ± 1.12  | 2.35 ± 1.52 | 1.75 ± 1.26 |
| 44 | 13.101                      | 1486 | Creatinine, 3TMS             | 0.01 ± 0.00 | -----       | 0.02 ± 0.03  | -----       | -----       |
| 45 | 19.011                      | 1913 | Palmitonitrile               | 0.09 ± 0.03 | 0.07 ± 0.04 | 0.25 ± 0.17  | 0.13 ± 0.14 | 0.12 ± 0.07 |
| 46 | 21.528                      | 2073 | 9-Octadecenitrile            | 1.19 ± 0.15 | 1.03 ± 0.52 | 2.15 ± 0.62  | 1.19 ± 0.58 | 1.38 ± 0.50 |
| 47 | 21.56                       | 2075 | 9-Octadecenitrile isomer     | 0.37 ± 0.12 | 0.46 ± 0.15 | 0.83 ± 0.50  | 1.10 ± 0.68 | 0.99 ± 0.47 |
| 48 | 25.552                      | 2309 | Octadecanamide, TMS          | 3.43 ± 0.62 | 3.59 ± 0.79 | 3.03 ± 0.82  | 3.09 ± 1.51 | 3.88 ± 1.80 |
| 49 | 25.561                      | 2311 | Octadecanamide, TMS isomer   | 4.09 ± 0.52 | 4.44 ± 1.38 | 3.78 ± 0.80  | 3.99 ± 2.36 | 4.35 ± 1.15 |
| 50 | 25.834                      | 2326 | Stearamide, TMS              | 0.04 ± 0.02 | 0.03 ± 0.03 | 0.03 ± 0.02  | 0.12 ± 0.20 | 0.04 ± 0.04 |
| 51 | 26.558                      | 2370 | Docos-9-enenitrile           | 0.42 ± 0.22 | 0.54 ± 0.25 | 1.11 ± 0.27  | 0.63 ± 0.31 | 0.69 ± 0.27 |
| 52 | 29.913                      | 2568 | (Z)-Docos-13-enamide, N-TMS  | 1.83 ± 0.60 | 1.22 ± 0.68 | 2.73 ± 0.56  | 1.56 ± 0.81 | 2.21 ± 0.87 |
|    | Total nitrogenous compounds |      |                              | 15.79       | 14.29       | 15.97        | 15.16       | 16.11       |
|    | <b>Organic acids</b>        |      |                              |             |             |              |             |             |
| 53 | 3.649                       | 1017 | Caproic acid, TMS            | 0.22 ± 0.18 | 0.02 ± 0.03 | 0.02 ± 0.03  | 0.08 ± 0.07 | 0.07 ± 0.06 |
| 54 | 4.377                       | 1060 | Lactic Acid, 2TMS            | 3.67 ± 3.37 | 8.77 ± 5.06 | 10.10 ± 3.02 | 1.98 ± 3.35 | 4.65 ± 5.17 |
| 55 | 4.445                       | 1063 | Lactic Acid, 2TMS isomer     | 8.58 ± 2.55 | 8.96 ± 3.55 | 6.89 ± 3.11  | 1.18 ± 6.27 | 8.05 ± 3.68 |
| 56 | 4.733                       | 1081 | Glycolic acid, 2TMS          | 0.01 ± 0.00 | 0.02 ± 0.02 | 0.02 ± 0.02  | 0.02 ± 0.02 | 0.02 ± 0.02 |
| 57 | 5.723                       | 1136 | Oxalic acid, 2TMS            | 0.01 ± 0.01 | 0.01 ± 0.01 | 0.20 ± 0.49  | 0.01 ± 0.02 | 0.00 ± 0.01 |
| 58 | 5.803                       | 1140 | Oxalic acid, 2TMS isomer     | 1.43 ± 1.15 | 1.17 ± 0.62 | 1.86 ± 0.78  | 1.75 ± 1.24 | 0.76 ± 0.89 |
| 59 | 6.101                       | 1156 | 3-Hydroxybutyric acid, 2TMS  | 0.35 ± 0.52 | 0.03 ± 0.02 | 0.03 ± 0.02  | 0.06 ± 0.04 | 0.07 ± 0.06 |
| 60 | 6.35                        | 1170 | Octanoic acid, TMS           | 0.01 ± 0.01 | 0.02 ± 0.02 | 0.01 ± 0.02  | 2.03 ± 0.05 | 0.02 ± 0.02 |
| 61 | 7.524                       | 1255 | 4-Hydroxybutanoic acid, 2TMS | 0.01 ± 0.01 | 0.01 ± 0.01 | 0.01 ± 0.01  | 2.01 ± 0.01 | 0.01 ± 0.01 |
| 62 | 9.027                       | 1338 | Succinic acid, 2TMS          | 0.01 ± 0.01 | 0.01 ± 0.01 | -----        | 2.02 ± 0.03 | 0.01 ± 0.02 |
| 63 | 10.615                      | 1397 | 3-Deoxytetronic acid, 3TMS   | 0.04 ± 0.03 | -----       | -----        | -----       | -----       |
| 64 | 11.036                      | 1412 | 3-Methylglutaric acid, 2TMS  | 0.01 ± 0.01 | 0.01 ± 0.01 | -----        | 2.01 ± 0.01 | 0.01 ± 0.01 |
|    | Total organic acids         |      |                              | 14.37       | 19.03       | 19.15        | 13.17       | 13.69       |

|    |                       |      |                                                           |             |              |              |              |              |
|----|-----------------------|------|-----------------------------------------------------------|-------------|--------------|--------------|--------------|--------------|
|    | <b>Sterols</b>        |      |                                                           |             |              |              |              |              |
| 65 | 32.901                | 2744 | Cholesterol, TMS                                          | 0.26 ± 0.08 | 0.08 ± 0.04  | 0.17 ± 0.13  | 0.13 ± 0.12  | 0.18 ± 0.10  |
|    | Total sterols         |      |                                                           | 0.26        | 0.08         | 0.17         | 0.13         | 0.18         |
|    | <b>Sugars</b>         |      |                                                           |             |              |              |              |              |
| 67 | 17.731                | 1823 | 1-Deoxyglucose, 4TMS                                      | 0.84 ± 0.34 | 0.26 ± 0.13  | 0.21 ± 0.12  | 0.27 ± 0.21  | 0.27 ± 0.12  |
| 68 | 18.236                | 1858 | Glucose, methyloxime, 5TMS                                | 9.05 ± 3.09 | 13.62 ± 5.33 | 10.98 ± 4.37 | 11.39 ± 9.97 | 12.47 ± 5.68 |
| 69 | 18.266                | 1860 | Glucose, methyloxime, 5TMS                                | 9.15 ± 2.98 | 9.13 ± 7.69  | 10.98 ± 4.37 | 2.80 ± 3.34  | 8.40 ± 8.24  |
| 70 | 18.475                | 1875 | Galactose, methyloxime, 5TMS                              | 7.05 ± 0.91 | 6.80 ± 0.92  | 6.06 ± 0.54  | 4.52 ± 2.66  | 6.02 ± 1.08  |
|    | Total sugars          |      |                                                           | 26.09       | 29.81        | 28.23        | 18.98        | 27.16        |
|    | <b>Sugar alcohols</b> |      |                                                           |             |              |              |              |              |
| 71 | 8.045                 | 1300 | Glycerol, 3TMS                                            | 3.03 ± 0.37 | 2.48 ± 1.55  | 2.18 ± 1.15  | 2.04 ± 1.60  | 2.08 ± 1.43  |
| 72 | 15.298                | 1666 | D-(+)-Arabitol, 5TMS                                      | 7.01 ± 1.21 | 3.11 ± 3.70  | 4.03 ± 2.60  | 3.94 ± 3.73  | 6.25 ± 2.66  |
| 73 | 15.324                | 1668 | D-(+)-Arabitol, 5TMS isomer                               | 7.01 ± 1.21 | 7.72 ± 1.56  | 5.58 ± 0.88  | 7.23 ± 3.94  | 7.52 ± 1.77  |
| 74 | 16.217                | 1724 | Ribitol, 5TMS                                             | 0.01 ± 0.00 | 0.01 ± 0.00  | -            | 0.01 ± 0.01  | 0.01 ± 0.00  |
|    | Total sugar alcohols  |      |                                                           | 17.05       | 13.31        | 11.79        | 13.22        | 15.86        |
|    | <b>Sugar lactones</b> |      |                                                           |             |              |              |              |              |
| 75 | 19.251                | 1929 | Glucuronic acid<br>γ-lactone, methyloxime, 3TMS           | 0.18 ± 0.09 | 0.07 ± 0.06  | 0.11 ± 0.08  | 0.12 ± 0.17  | 0.08 ± 0.09  |
| 76 | 19.599                | 1953 | Glucuronic acid<br>γ-lactone, methyloxime, 3TMS<br>isomer | 0.06 ± 0.04 | 0.02 ± 0.02  | 0.09 ± 0.10  | 0.02 ± 0.02  | 0.02 ± 0.02  |
|    | Total sugar lactones  |      |                                                           | 0.24        | 0.09         | 0.21         | 0.13         | 0.10         |
|    | <b>Unknowns</b>       |      |                                                           |             |              |              |              |              |
| 77 | 8.883                 | 1332 | Unkonwn 1                                                 | 0.71 ± 0.09 | 0.64 ± 0.29  | 0.60 ± 0.26  | 0.56 ± 0.33  | 0.53 ± 0.28  |
| 78 | 18.664                | 1889 | Unknown 2                                                 | 0.17 ± 0.08 | 0.06 ± 0.07  | 0.03 ± 0.03  | 0.25 ± 0.38  | 0.17 ± 0.17  |
| 79 | 18.669                | 1889 | Unknown 3                                                 | 0.14 ± 0.04 | 0.07 ± 0.05  | 0.03 ± 0.03  | 0.15 ± 0.13  | 0.14 ± 0.07  |
| 80 | 18.931                | 1907 | Unknown 4                                                 | 0.33 ± 0.24 | 0.36 ± 0.42  | 0.37 ± 0.44  | 0.79 ± 1.31  | 0.48 ± 0.73  |

|    |                |      |           |                 |                 |                 |                 |                 |
|----|----------------|------|-----------|-----------------|-----------------|-----------------|-----------------|-----------------|
| 81 | 20.177         | 1992 | Unknown 5 | $0.62 \pm 0.23$ | $0.24 \pm 0.12$ | $0.16 \pm 0.08$ | $0.23 \pm 0.17$ | $0.25 \pm 0.17$ |
| 82 | 24.361         | 2240 | Unknown 6 | $5.76 \pm 0.82$ | $6.06 \pm 2.68$ | $7.52 \pm 2.34$ | $5.23 \pm 2.96$ | $7.01 \pm 1.66$ |
|    | Total unknowns |      |           | 7.73            | 7.43            | 8.71            | 7.21            | 8.58            |



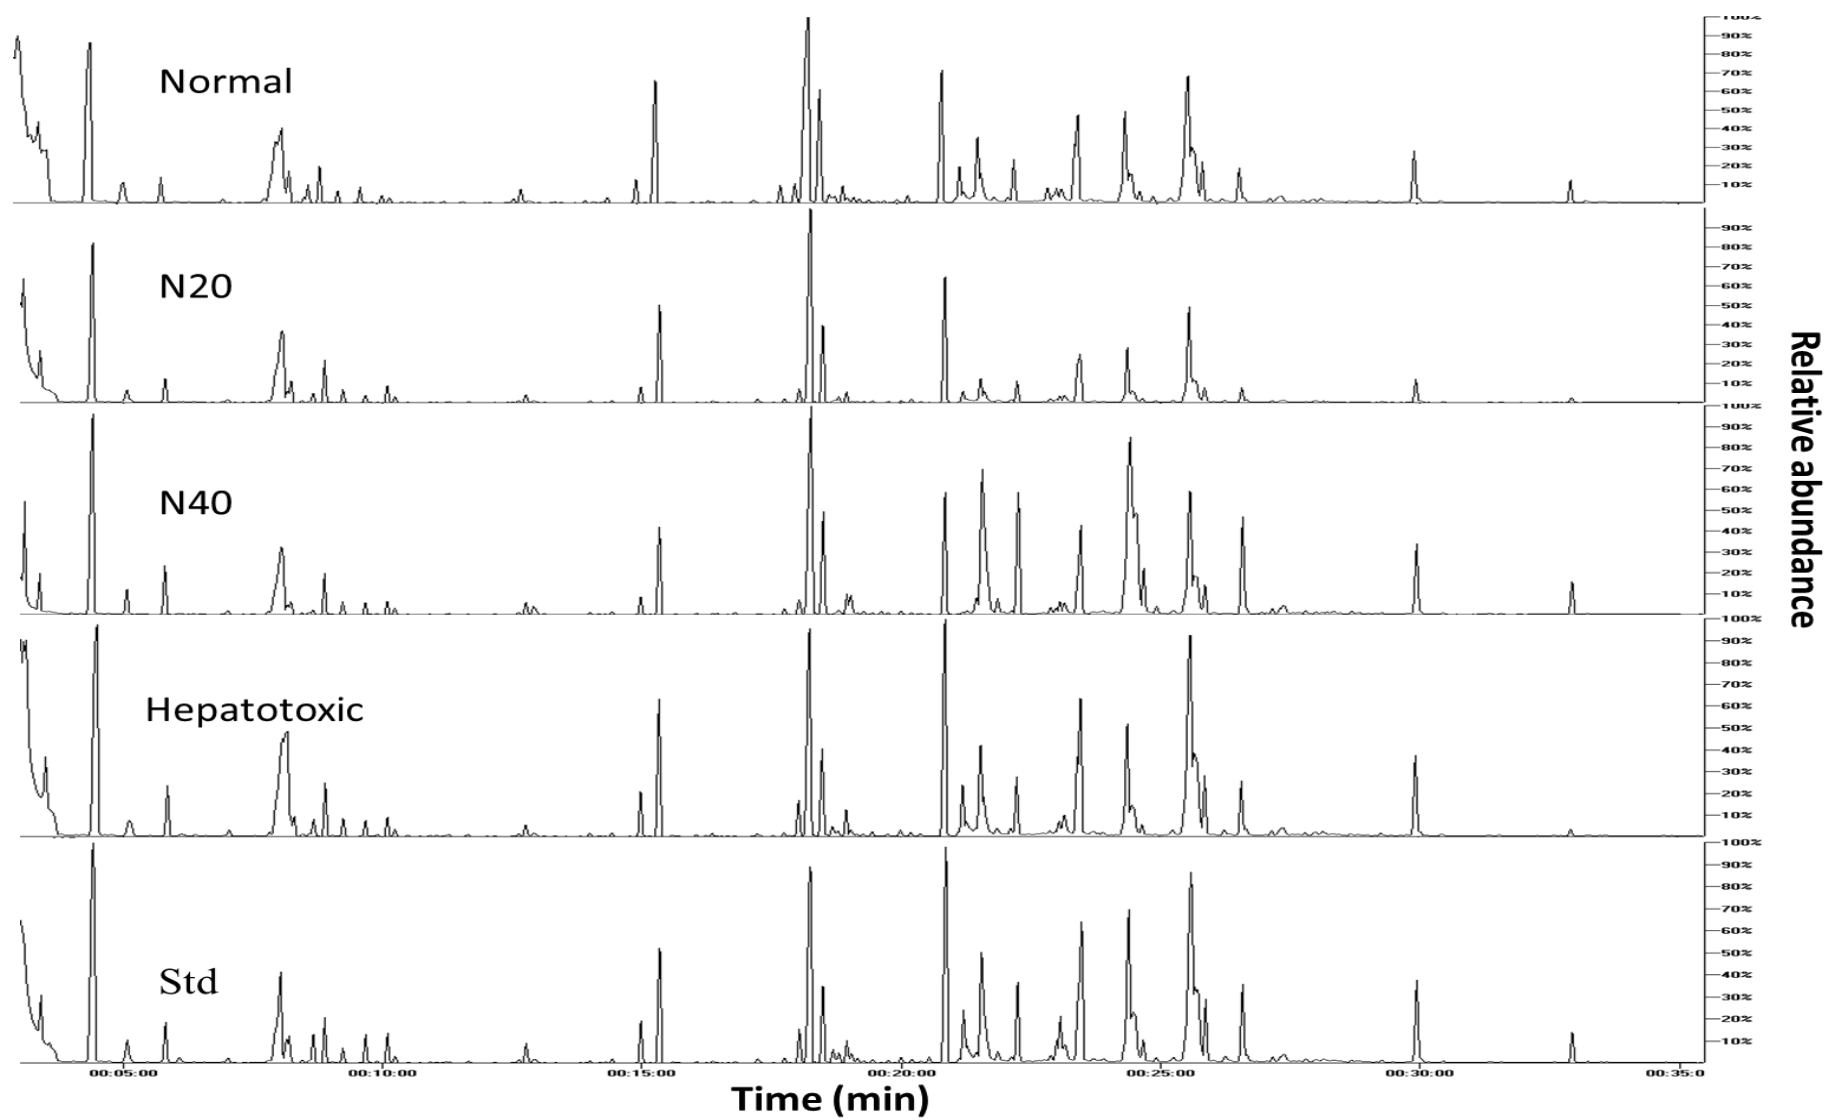

**Figure S3.** The representative chromatograms of serum samples from different animal groups. • N20: naringenin at 20 mg/kg, N40: naringenin at 40 mg/kg, Std: standard drug (silymarin).
